1  
2  
3  
4  
5  
6  
7  
8  
9  
10  
11  
12  
13  
14  
15  
16  
17  
18  
19  
20  
21

State-dependent differences in the frequency of TMS-evoked potentials between  
resting and active states

Candice T. Stanfield<sup>1\*</sup>, Martin Wiener<sup>1</sup>

<sup>1</sup> Department of Psychology, George Mason University, Fairfax, Virginia, United States of  
America

\* Corresponding author  
E-mail: [cstanfie@gmu.edu](mailto:cstanfie@gmu.edu) (CTS)

## 22 **Abstract**

23 Previous evidence suggests different cortical areas naturally oscillate at distinct  
24 frequencies, reflecting tuning properties of each region. The concurrent use of transcranial  
25 magnetic stimulation (TMS) and electroencephalography (EEG) has been used to perturb cortical  
26 regions, resulting in an observed post-stimulation response that is maximal at the natural frequency  
27 of that region. However, little is known about the spatial extent of TMS-induced activation  
28 differences in cortical regions when comparing resting state (passive) versus active task  
29 performance. Here, we employed TMS-EEG to directly perturb three cortical areas in the right  
30 hemisphere while measuring the resultant changes in maximal evoked frequency in healthy human  
31 subjects during a resting state (N=12) and during an active sensorimotor task (N=12). Our results  
32 revealed that the brain engages a higher dominant frequency mode when actively engaged in a  
33 task, such that the frequency evoked during a task is consistently higher across cortical regions,  
34 regardless of the region stimulated. These findings suggest that a distinct characteristic of active  
35 performance versus resting state is a higher state of natural cortical frequencies.

36

## 37 **Introduction**

38 The influence of task-evoked activation and behavior on the modification of spontaneously  
39 occurring patterns of neural activity remains a fundamental question in neuroscience. For decades,  
40 non-invasive brain stimulation techniques, such as transcranial magnetic stimulation (TMS), have  
41 been used to modulate neural activity in humans and other mammals. Furthermore, in numerous  
42 reports, concurrent TMS and electroencephalography (EEG) has been employed to examine  
43 cortical reactivity and connectivity. A variety of research using TMS, and some using concurrent  
44 TMS-EEG, demonstrates TMS-evoked behavioral and neural effects that are dependent on  
45 whether the subject is engaged in a task or not (Johnson, et al. 2012; Thut, et al. 2003; 2011;  
46 Romero, et al, 2019; Silvanto, et al. 2007; 2008; Romei, et al. 2008; Massimini, et al. 2010; Miniussi,  
47 et al. 2010; Romei, et al. 2016; Petrichella, et al. 2017) , as well as differences in neural activation  
48 during wakeful versus sleeping states (Massimini, et al. 2005).

49 In neural stimulation research, more is known about the influence exogenous factors have  
50 on the brain's electrical response to TMS (frequency and intensity of stimulation; positioning and  
51 orientation of the stimulation coil), as opposed to endogenous factors (e.g., global brain state).

52 However, over the past decade, there has been an emergence of research using concurrent TMS-  
53 EEG to investigate the influence of endogenous factors on neural response. One such study  
54 observed an increase in amplitude and spatial spread during the performance of a short-term  
55 memory task (Johnson, et al. 2012). Moreover, the observed task-related excitability increased as  
56 a result of stimulation to the cortical area, including spread of TMS-evoked currents to functionally  
57 connected areas. Globally, the dominant frequency recorded at the scalp matched that of the  
58 stimulated area. Yet, local cortical areas oscillated at a rate closer to its own natural frequency,  
59 even when not directly stimulated. Lower-frequency oscillatory peaks were observed in the frontal  
60 and parietal cortex (7 Hz in the theta band, and 10 Hz in the alpha band, respectively), reflecting  
61 synchronization of local cortical oscillations to parallel networks engaged in task performance.  
62 Similar results were reported in a study that provided the first direct evidence for causal  
63 entrainment of brain oscillations by short rhythmic TMS bursts while recording resultant EEG  
64 responses (Thut, et al. 2011). The TMS entrainment evoked spatially specific and frequency-  
65 specific oscillatory signatures that mimic naturally occurring task-related modulations that are of  
66 functional significance. Overall, these task-dependent changes exemplify the importance of further  
67 investigation into the influence of endogenous factors, such as global brain state.

68 Task-dependent changes have also been observed at the single-cell level, with concurrent  
69 single-pulse TMS administered to awake rhesus monkeys (Romero, et al. 2019). During  
70 performance of a visually-guided grasping task, action potentials in individual neurons within the  
71 parietal area PFG were recorded extracellularly, while either low intensity (60% of the resting  
72 Motor Threshold; rMT) or high intensity (120% of the rMT) stimulation was being administered.  
73 Unlike in previous observations of anesthetized animals, single-pulse stimulation induced a highly  
74 localized and transient excitation followed by reduced activity, corresponding with a significantly  
75 longer grasping time. Thus, the stimulation interfered with task-related activity in parietal neurons,  
76 while simultaneously causing behavioral effects. Additionally, the stimulation induced a highly  
77 localized and short-lived excitation of single neurons in the parietal cortex; however, the TMS-  
78 induced activity and task-related activity did not linearly summate in the PFG neurons. As such,  
79 the spatial spread of TMS-induced spiking activity appeared dissociable from TMS-induced  
80 oscillatory activity, which tends to spread more remotely.

81 In addition to TMS-evoked activation studies, a large body of research has focused on  
82 oscillatory signatures arising from macro- and micro-scale neural recordings. Among these studies

83 has arisen the concept of natural frequencies of human cortical modules, suggesting that distinct  
84 regions of the cortex may naturally oscillate at distinct frequencies (Niedermeyer, et al. 1999). Of  
85 great interest is an expansion of the natural frequencies concept, reporting evoked dominant  
86 oscillations in specific cortical regions, with posterior regions naturally resonating at lower  
87 frequencies (~10Hz, alpha) and anterior regions at higher frequencies (~40Hz, gamma) (Rosanova,  
88 et al. 2009; Ferrarelli, et al. 2012).

89 While the above results suggest state-dependent differences in cortical oscillations and  
90 neuronal connectivity, that may be examined using TMS-EEG, the difference in evoked oscillatory  
91 activity between resting and active task states has rarely been investigated (Johnson, et al. 2012),  
92 let alone how this effect might differ across different stimulation sites. To further explore this, in  
93 the present study we tested two groups of subjects (N=12 each) while simultaneously applying  
94 single-pulse TMS and recording resultant EEG responses. One group was tested while subjects  
95 were at rest, similar to the previous reports, while a second group was tested while actively engaged  
96 in a simple sensorimotor task. We repeated the methods and analysis regimes of the prior studies,  
97 wherein TMS was administered and frequency spectra data were obtained to measure the  
98 maximum evoked frequency at each stimulation site (Rosanova, et al. 2009).

## 99 **Materials and methods**

100 *Subjects.* Twenty-four right-handed subjects (12 females, age 19–36 years) with normal or  
101 corrected-to-normal visual acuity participated in this study, and were randomized into one of two  
102 groups: twelve subjects participated in the passive experiment (7 females, mean age 22.5 years),  
103 while the other twelve subjects participated in the active experiment (5 females, mean age 25.2  
104 years). Following safety and ethical guidelines (Rossi, et al. 2009), all subjects were eligible to  
105 receive TMS. All subjects provided informed consent and all protocols were approved by the  
106 George Mason University Institutional Review Board.

107 *TMS.* A focal figure-of-eight coil with 70mm wing diameter driven by a Magstim Rapid<sup>2</sup>  
108 biphasic stimulator (Magstim Inc., Wales, UK) was used to non-invasively stimulate the subjects’  
109 cortex. On the right hemisphere of the scalp, three cortical sites were selected over the EEG  
110 electrodes P4 (occipital), C4 (parietal), and F4 (frontal). These sites were chosen as homologous  
111 regions to those stimulated previously in a study demonstrating distinct frequency responses  
112 (Rosanova, et al. 2009). To verify anatomical locations of the cortical stimulation sites a T1-  
113 weighted MRI of one subject was used and targeted using MNI coordinates in the Brainsight

114 neuronavigation system (Rogue Research Inc., Montreal, Canada). MRI scans were unavailable  
115 for the other subjects in this study.

116 *High-density EEG recording during TMS.* TMS-evoked potentials (TMS-EP) were  
117 recorded using an actiCHamp 64-channel amplifier (Brain Products GmbH, Germany) and TMS-  
118 compatible actiCAP slim active electrodes (international 10-20 system), with FCz as the online  
119 reference. BrainVision Recorder (v. 1.20.0801) was used to digitize the EEG at a sampling  
120 frequency of 5000 Hz. Electrode impedances were kept <20 k $\Omega$ . To minimize contamination of  
121 auditory potentials evoked by the click associated with the TMS coil discharge (ter Braack, et al.  
122 2015), subjects underwent a TMS-click auditory perception (TMS-CAP) test prior to beginning  
123 the experiment. During the test, subjects wore inserted wired silicone-tipped earplug headphones  
124 with a Noise Reduction Rating (NRR) of 26 dB, while a masking noise with the same spectral  
125 profile of the TMS coil click was continuously played. Recordings of the TMS coil click emitted  
126 by the Magstim coil were used to create the masking noise and scrambled into a continuous sound  
127 file with the same spectral properties, thus, capturing the specific time-varying frequency  
128 components of the TMS click. For the TMS-CAP test, subjects listened to the masking noise while  
129 a brief TMS burst was administered on top of the FCz (average reference) electrode. Subjects were  
130 instructed to notify the experimenter if they could hear the TMS coil click. If a subject reported  
131 hearing the click, the volume of the masking noise was raised to a level still comfortable for the  
132 subject and/or the stimulator intensity output percentage was lowered until the click was as  
133 imperceptible as possible without lowering the stimulator output to an ineffective intensity (<40  
134 V/m) (Rosanova, et al. 2009). Once the TMS-CAP was complete, subjects were required to  
135 continue wearing the earplug headphones for the duration of the experiment while listening to the  
136 masking noise at their individualized fixed volume. All TMS-induced artifacts were attended to  
137 during offline analysis.

138 *TMS protocol.* During this experiment, subjects in both groups received a single-pulse  
139 TMS protocol. This consisted of a series of TMS pulses that were administered one-at-a-time over  
140 a part of the brain on the right hemisphere of the scalp, approximately over electrodes P4, C4, and  
141 F4 (Fig 1). At each of the three electrode sites, a total of 100 pulses were administered repetitively  
142 at each site, separated by a short period of time based on randomized experimental group  
143 assignment (passive or active), resulting in a total of 300 pulses overall. Based on their individual  
144 TMS-CAP results, subjects in the passive experimental group received single pulse stimulation at

145 a fixed intensity of between 30–50% of maximum stimulator output (MSO; range 44.7–74.5 V/m),  
146 while subjects in the active experimental group received single pulse stimulation at a fixed  
147 intensity of between 35–50% of MSO (range 52.1–74.5 V/m,); both groups received an average  
148 of 42.5% MSO ( $\pm 7.23$  for passive and  $\pm 5.84$  for active, respectively). According to an  
149 independent samples t-test, MSO values were not different between the two groups;  $t(22) = 0, p =$   
150 1.

151 We additionally calculated the modeled electrical field of our TMS stimulator across the  
152 different MSO intensities employed. To that end, we conducted electrical field modeling using  
153 SimNIBS software (v. 2.1.20) (Thielscher, et al. 2015), on a standardized MNI template with a  
154 modeled Magstim TMS coil matching our own. Similar to MSO values, we observed no  
155 differences between groups (Passive: average  $63.3 \pm 10.77$  V/m; Active: average  $63.3 \pm 8.71$  V/m).  
156 Additionally, we note that the lowest intensity in our tested sample (44.7 V/m) did not exceed the  
157 minimal intensity previously reported as minimal for evoking dominant frequencies (Rosanova, et  
158 al. 2009).

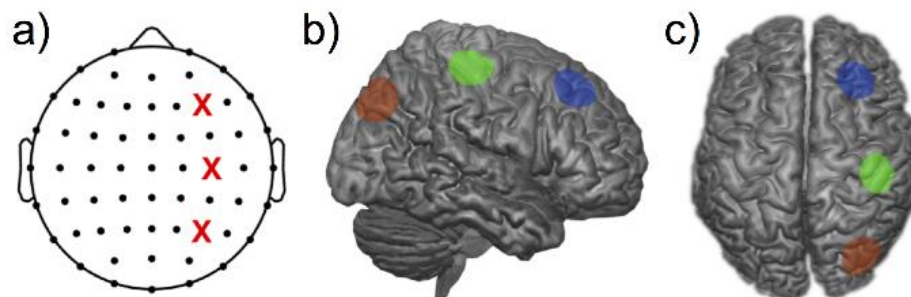

159  
160 **Fig 1. Stimulation sites.** a) represents electrode stimulation sites, indicated by red X mark; top X is F4, middle X is  
161 C4, and bottom X is P4. Images b) and c) represent stimulation sites on a rendered brain as determined by Brainsight  
162 localization of the TMS coil on a sample subject.  
163

164 *General experimental procedures for both experimental groups.* During the experiment,  
165 subjects sat in an ergonomic chair, relaxed, and with eyes open looking at a fixation cross on a  
166 screen. Once the selected electrode site was targeted, we stimulated it at an intensity that was set  
167 by the subject's TMS-CAP results.

168 *Passive group experimental procedures.* Subjects in the passive experimental group did  
169 not perform a sensorimotor task; instead, they were instructed to rest with their eyes open during  
170 the experiment. Subjects viewed an LCD monitor with a 120 Hz refresh rate (Cambridge Research  
171 Systems, United Kingdom) approximately 70-cm away with a black background, and were

172 instructed to keep their eyes fixed on a 5x5 cm black fixation cross that appeared in the center of  
173 the screen. Each of the three electrode sites were stimulated in a counterbalanced block design and  
174 received 100 stimuli per block at a randomized inter-stimulation-interval (ISI) between 4–6  
175 seconds.

176 *Active group experimental procedures and task.* Subjects in the active experimental group  
177 performed a sensorimotor luminance detection task that relied on gradual signal detection, and was  
178 programmed in PsychoPy (v. 1.85.6) (Peirce, 2009). Subjects viewed a screen approximately 70-  
179 cm away with a grey background and a 5x5 cm fixation cross with a white outline in the center of  
180 the screen that gradually changed from a solid black center to solid white, achieving full luminance  
181 (Fig 2). Once the subject perceived the fixation cross to reach full luminance, they pressed a key  
182 with their right hand, upon which a single-pulse stimulation was delivered before the next trial  
183 automatically began. A white outline of a fixation cross was presented to each subject at the start  
184 of each trial, during which the interior gradually increased in luminance at a rate of 0.0025  
185 value/frame (in HSV units). Each of the three electrode sites were stimulated in a counterbalanced  
186 block design and received 100 stimuli per block.

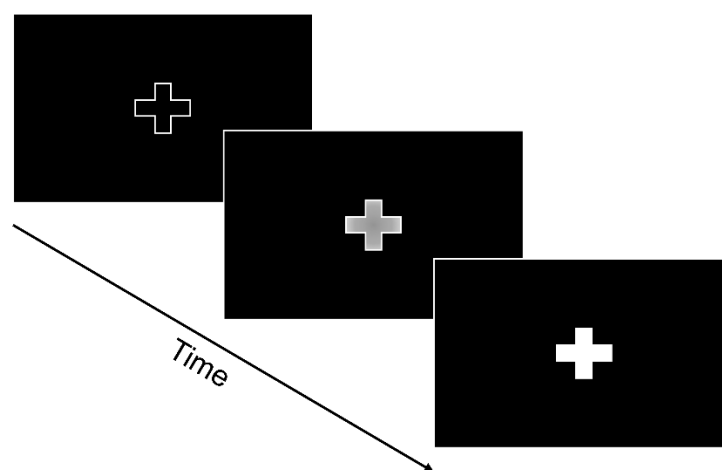

187  
188 **Fig 2. Schematic of the sensorimotor luminance detection task for the active experimental group.** Subjects  
189 viewed a fixation point that gradually became illuminated in the center, and were required to press a button when they  
190 judged the luminance to be fully saturated, thus initiating the next trial.

191  
192 *Analysis.* Offline data analysis was conducted using the EEGLAB MATLAB Toolbox  
193 (Delorme & Makeig, 2004) in MATLAB R2017b (The MathWorks Inc., Natick, MA). Continuous  
194 data were downsampled to 500 Hz and subsequently analyzed via the *clean\_rawdata* plugin (v.  
195 0.34) (Kothe, 2014) to clean continuous data following the Artifact Subspace Reconstruction  
196 (ASR) method (Mullen, et al. 2013) to remove bad EEG channels. To prevent result biases from



197 potentially removing excessive datapoints, *clean\_rawdata* provided us with controlled, objective  
198 rejection criteria to eliminate noisy channels for such artifacts as eye blinks and face/neck muscle  
199 activity. Following this, all data were re-referenced to the grand average of all electrodes and then  
200 epoched for all three stimulation sites from -1000 to +1000 ms around the TMS pulse; the data for  
201 each epoch was baseline-corrected to the mean of the entire epoch span.

202 *TMS-artifact removal.* Given the emergence of concurrent TMS and EEG as an important  
203 tool for assessing cortical properties, TESA—an open-source extension for EEGLAB—was  
204 created with the purpose of improving and standardizing analysis across the field of TMS-EEG  
205 research (Rogasch, et al. 2017). We applied the TESA toolbox to all three stimulation site epochs  
206 to remove artifacts; all steps adhered to the TESA pipeline (Rogasch, et al. 2017). This process  
207 involved 1) removing all data around the TMS pulse from -10 to +10 ms, 2) interpolating removed  
208 data within the TMS pulse, 3) removing noisy trials via EEGLAB’s built-in joint probability  
209 detection, 4) running a first round of independent component analysis (ICA) using the FastICA  
210 algorithm, 5) removing artifact components via visual inspection, 6) applying a first-order  
211 Butterworth filter with a bandpass of 1–100 Hz, as well as a notch filter to remove 60 Hz electrical  
212 line interference, 7) running a second round of FastICA with subsequent artifact component  
213 rejection. Following the above steps, data were again filtered between 1 and 50 Hz and segregated  
214 into separate, site-specific epochs.

215 *Time/frequency analysis.* To analyze time-frequency domain responses we calculated the  
216 event-related spectral perturbation (ERSP) values based on Morlet wavelets, via the EEGLAB  
217 *newtimef* function, by convolving a mother wavelet at 100 linearly-spaced frequencies spanning 5  
218 to 50 Hz, with 3.5 cycle wavelets and a 0.5 scaling factor. Baseline correction was applied to the  
219 average power across trials by subtracting the mean baseline power. Analysis of time/frequency  
220 data thus proceeded at the “global” level, following the convention of previous experiments  
221 (Rosanova, et al. 2009). Accordingly, global effects were determined by averaging, for each  
222 subject, the time/frequency spectrogram across all electrodes to form a single representation of the  
223 ERSP across the scalp. To minimize the effect of possible artifacts occurring at the time of  
224 stimulation, natural frequencies were calculated by averaging the ERSP values in a time window  
225 between 20 and 200 ms (see below).

226 *Global field power.* In addition to the analysis of ERSP data, we also calculated global field  
227 power (GFP), defined as the reference-independent response strength, and calculated as the



228 standard deviation across all electrodes at each timepoint (Murray, et al. 2008). GFP data were  
229 analyzed across all three sites of stimulation, separately for passive and active groups, in order to  
230 determine if there were any differences in evoked activity following TMS at any site.

231 *Natural frequencies.* Our analysis of natural frequencies proceeded according to the  
232 description from previous reports (Rosanova, et al. 2009; Ferrarelli, et al. 2012). To determine the  
233 natural frequency for each subject at each stimulation site, the global ERSP (gERSP) response was  
234 analyzed by calculating the sum of power values for each frequency within the 20–200 ms time  
235 window, and then determining which frequency had the highest value. In this way, the max  
236 frequency would not be driven alone by a single frequency with a very high peak, but could instead  
237 be provided by a frequency with a moderate yet sustained response that was larger than at other  
238 frequency bands. Natural frequencies were calculated for each stimulation site for each subject in  
239 both groups.

240 *Statistical analysis.* All statistical analysis of behavioral data and natural frequencies were  
241 carried out in SPSS (v. 19, IBM Corporation). For the analysis of global and local effects, we  
242 employed cluster-level corrections for significance ( $p < 0.05$ ) (Maris & Oostenveld, 2007) and  
243 implemented via Fieldtrip using the *statcondfieldtrip* command in EEGLAB. For both local and  
244 global effects, we determined regions of significant deviation from baseline for each of the sites,  
245 for each of the two groups. In addition, we compared the gERSP between groups, by averaging  
246 across all three sites within each group and comparing the overall responses.

## 247 **Results**

### 248 **Global response to TMS**

249 Our initial analyses set out to attempt to reproduce the methods used by previous studies  
250 (Rosanova, et al. 2009; Ferrarelli, et al. 2012) for reporting dominant frequencies in specific  
251 cortical regions. In these studies, an increase in power is observed following TMS that is maximal  
252 at a particular frequency band, dependent on the site of stimulation. These changes reflect the  
253 spectral properties of the TMS-evoked oscillations, which consists of a number of repeated  
254 positive and negative deflections (Lioumis, et al. 2009). When examining the gERSP response,  
255 averaged across all electrodes, we observed a combination of increases and decreases in power  
256 following TMS. Notably, only the *decreases* in power survived our cluster-corrected significance  
257 threshold, in contrast to the original findings. This finding was observed across both passive and

258 active groups. However, we note that our study used a different design and methods to these  
259 previous reports. Most notably, these previous studies stimulated cortical regions at a much higher  
260 intensity than ours; in the present study, we sought to reduce the impact of artifact peripheral  
261 components in the TMS-EP (Conde, et al. 2019). In doing so, our stimulation intensities were far  
262 lower than that used previously. Nevertheless, the difference in evoked frequency response  
263 between conditions, our modeling findings, and behavioral differences in the active group between  
264 motor cortex stimulation and other sites suggest that our stimulation intensities were sufficient for  
265 inducing activity in cortical columns.

266 Crucial differences were observed between passive and active groups, as well as between  
267 the different sites of stimulation. For the passive group, we observed decreases in power that were  
268 synchronous with the TMS pulse in the gamma frequency band (40–50 Hz) across all three sites.  
269 Across stimulation sites, the gamma desynchronization became longer lasting from posterior to  
270 frontal regions, and was further accompanied at the frontal site by a significant decrease in the  
271 high beta range (20–30 Hz) approximately 100–300 ms after the TMS pulse. In contrast, the active  
272 group exhibited a larger desynchronization response across all three sites, extending from the beta  
273 to gamma range (Fig 3).

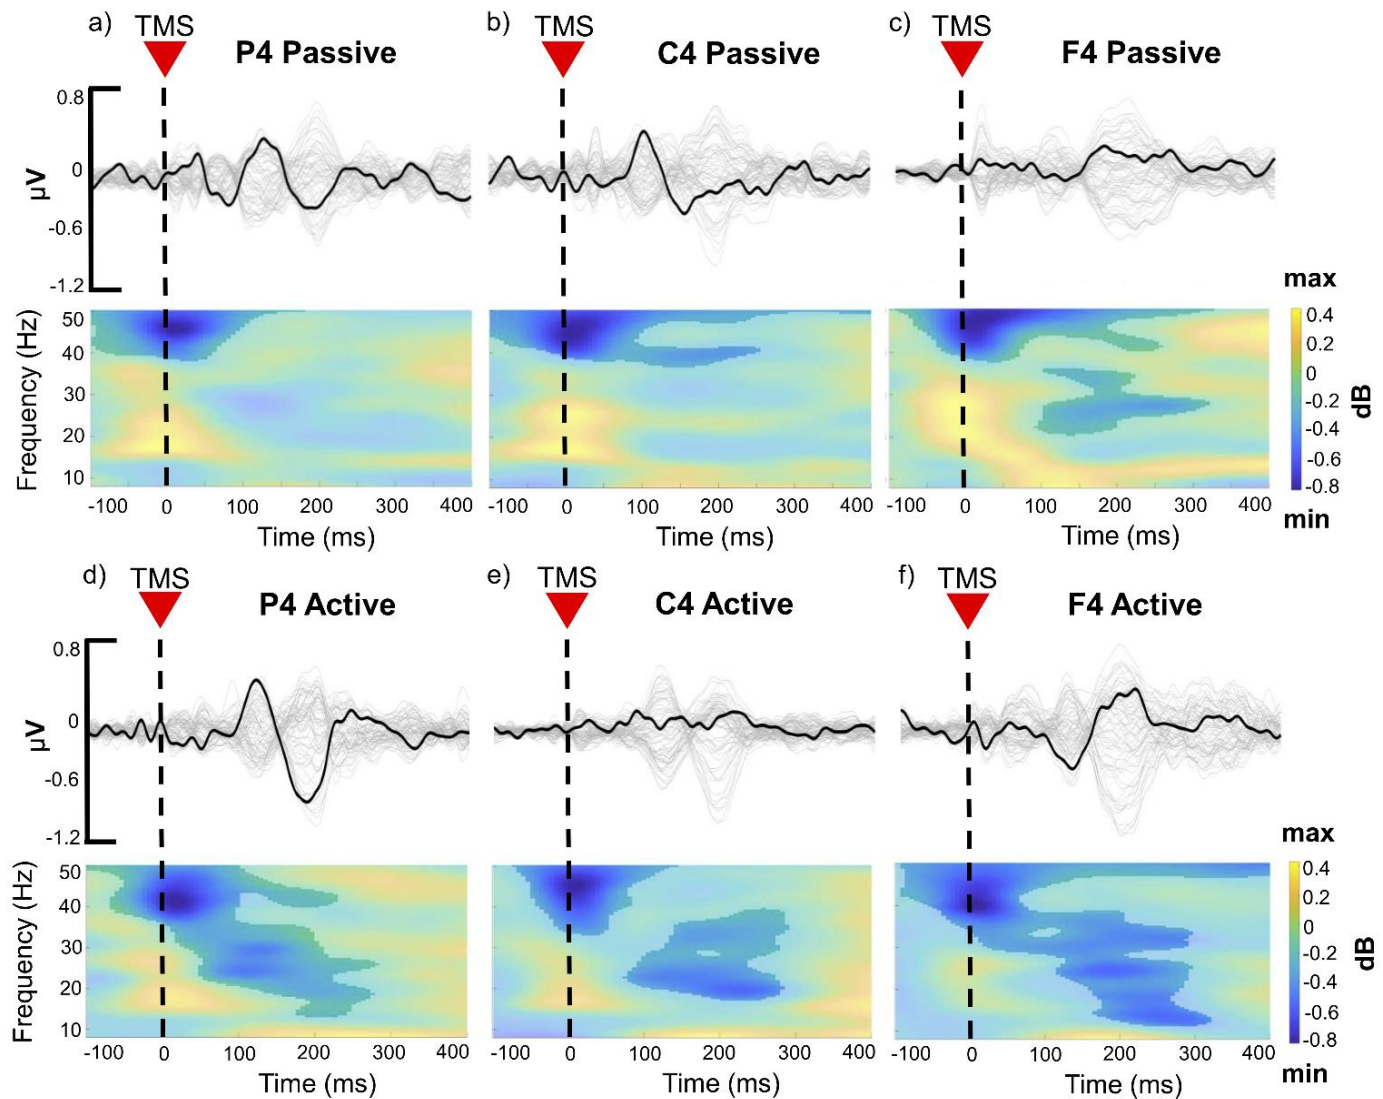

274  
275 **Fig 3. Global plots for all subjects illustrating the three cortical sites targeted by TMS.** Butterfly plots (top panels)  
276 of all electrode time courses with the black trace line highlighting the electrode directly underlying the stimulator.  
277 ERSP plots (bottom panels) display saturated color areas representing significant frequency (Hz) activation compared  
278 to baseline. (a) P4 for passive group, (b) C4 for passive group, (c) F4 for passive group. (d) P4 for active group, (e)  
279 C4 for active group, (f) F4 for active group. Significance was determined via cluster-based permutation testing.  
280

281 In addition to the spectral response, we also calculated and measured the GFP. Here, as  
282 well, we observed no differences between site in the evoked response, nor was there any difference  
283 between passive and active groups (Fig 4).

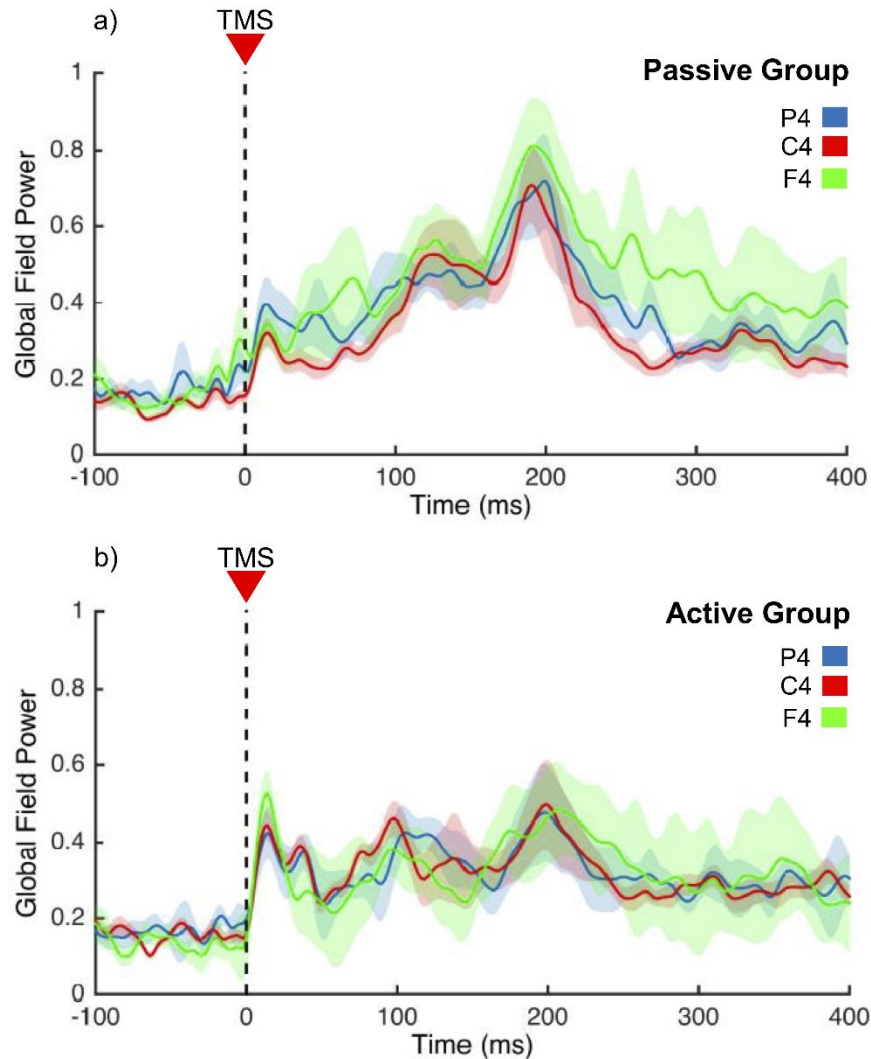

284  
285 **Fig 4. Global field power (GFP) across stimulation sites and groups.** Shaded regions display standard error. No  
286 differences between stimulation site or group were detected.  
287

## 288 Natural frequencies

289 The major finding of the previous work was that the so-called “natural frequency,”  
290 characterized as the frequency band with the largest sustained response to TMS, increases in a  
291 rostro-caudal gradient. Calculating the natural frequency using the same method outlined by the  
292 previous authors yielded a range of values across all three sites. Though the individual maximum  
293 frequencies showed a large oscillatory range, there were no outliers. Yet, no linear effects were  
294 observed in these values across all three sites, for either the passive or active groups. However,  
295 along with the gERSP responses, we observed that the active task group exhibited significantly  
296 higher natural frequencies evoked by TMS than the passive group. A two-way ANOVA revealed  
297 that group type had a significant effect on mean activation in Hz ( $F(1, 22) = 4.557, p = 0.044, \eta^2$

298 = 0.172), with higher frequencies reported during the active experimental group ( $M = 22.43$ ,  $SD =$   
299 12.24) compared to the passive experimental group ( $M = 15.66$ ,  $SD = 12.6$ ).

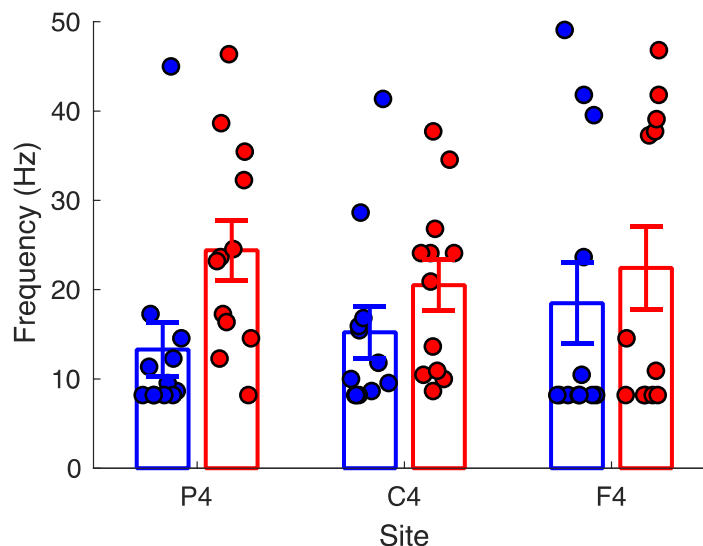

300 **Fig 5. Mean natural frequencies, based on stimulation site and group assignment.** Individual data points represent  
301 the maximal evoked frequency for each subject in the resting (blue) and active (red) state subject groups. Consistently  
302 higher evoked frequencies were observed across all stimulation sites for the active state subjects. Error bars represent  
303 standard error.  
304  
305  
306

### 307 **Active group response times.**

308 Response times (RTs) were calculated in seconds (s) for the active group, which performed  
309 the illumination detection task; P4 ( $2.20 \pm 1.24$ ), C4 ( $2.44 \pm 1.27$ ), F4 ( $2.26 \pm 1.26$ ) (Fig 6). A  
310 nonparametric Friedman test showed a significant difference in RTs between stimulation sites;  
311  $\chi^2(2, 12) = 8.667$ ,  $p = 0.013$ . Post hoc analysis with Wilcoxon signed-rank tests were conducted  
312 with a Bonferroni correction applied, resulting in a significance level set at  $p < 0.05$ . Median (IQR)  
313 RTs based on stimulation sites were 2.13 s (1.19 to 2.74) for P4, 2.05 s (1.52 to 2.92) for C4, and  
314 2.06 s (1.17 to 2.76) for F4, respectively. There were no significant differences between RTs for  
315 P4 and F4 ( $Z = -0.784$ ,  $p = 0.433$ ) or between RTs for C4 and F4 ( $Z = -1.412$ ,  $p = 0.158$ ). However,  
316 there was a significant difference between RTs for C4 compared to P4, with slower RTs overall  
317 for C4 ( $Z = -1.961$ ,  $p = 0.05$ ).

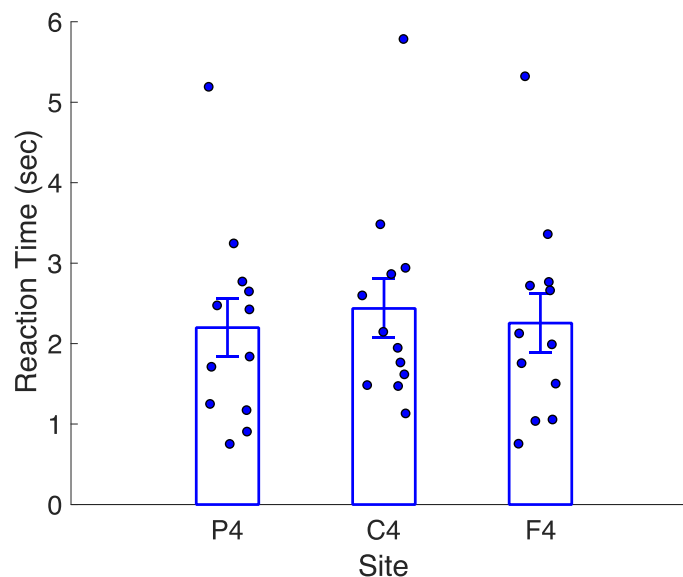

318  
319 **Fig 6. Average active group task response times (RTs) in seconds, based on electrode stimulation site.** Blue  
320 circles represent for mean RTs for each active task subject, per stimulation site. Subjects were moderately slower in  
321 responding following single-pulse stimulation over C4. Error bars represent standard error.  
322

## 323 Discussion

324 In the current study, we used concurrent TMS-EEG to investigate cortical reactivity  
325 differences between passive state and active sensorimotor task performance. Our results revealed  
326 a complexity of patterns in global and local changes that occur in response to stimulation, in  
327 addition to conspicuously broader and distinct patterns between the passive and active states.  
328 These findings suggest cortical regions exhibit complex frequency-specific profiles. Specifically,  
329 our findings suggest that oscillatory mechanisms are characterized by more complex, state-  
330 dependent patterns than have previously been appreciated. Additionally, our findings suggest that  
331 patterns of ongoing spontaneous activity are modified by task performance, and differ based on  
332 individual activation patterns.

333 Endeavoring to explain the complexity of varying oscillatory bands, further investigation  
334 into whether timescales of different frequency bands correlate with a sensory-to-higher  
335 processing hierarchy was conducted (Mellem, et al. 2017). However, no strong biases toward  
336 specific timescales across cortical regions was observed, nor exclusivity of lower areas biased  
337 toward faster frequencies or higher areas biased toward slower frequencies. Thus, it was  
338 contended that dominant higher-frequency bands observed in the frontal cortex during concurrent  
339 TMS-EEG studies may be a result of that brain region's involvement in higher level cognition.



340 This explanation has potential to elucidate our findings of higher frequency evoked power across  
341 the brain during sensorimotor task engagement. Furthermore, frequency bands may serve as  
342 channels of communication across brain regions, though dependent on the activation in multiple  
343 bands within each region (Hillebrand, et al. 2016).

344 Perhaps the most notable aspect of our findings is the difference in evoked frequency  
345 between the experimental groups. While performing the sensorimotor task, evoked responses  
346 became more widespread in both frequency and time; additionally, when comparing the natural  
347 frequency between experimental groups, the sensorimotor task was observed to evoke a  
348 consistently higher frequency than in the resting state group. This difference suggests that  
349 cognitive engagement incorporates higher frequency oscillations, consistent with several other  
350 known findings of brain function (Crone, et al. 1998; 2011; Canolty, et al. 2006; Voytek, et al.  
351 2010; Groppe, et al. 2013). A state-dependent TMS effect might account for these findings. State-  
352 dependency is defined as response changes according to the state of the cortex when the stimulus,  
353 such as a TMS pulse, is applied (Siebner, et al. 2009). Moreover, the state of activation has been  
354 shown to influence the response (Romero, et al, 2019; Silvanto, et al. 2007; 2008; Romei, et al.  
355 2008; Massimini, et al. 2010; Miniussi, et al. 2010; Romei, et al. 2016; Petrichella, et al. 2017).  
356 The effect of small TMS pulses might be facilitated if the cortex is already active; thus, it would  
357 be reasonable to presume that single pulse stimulation may well enhance cortical activation while  
358 a subject is actively engaged in a task (Matthews, 1999). Previous studies have shown evidence of  
359 the effect of TMS pulses varying as a function of the state of the brain. For example, when  
360 comparing neuronal activation during resting/baseline states to active task engagement,  
361 researchers found TMS over the motor cortex enhanced activation during motor execution and  
362 motor imagery (Kasai, et al. 1997; Fadiga, et al. 1999; Hashimoto, et al. 1998), while others found  
363 greater ease of inducing phosphenes with TMS over the occipital region during visual mental  
364 imagery (Sparing, et al. 2002). The latter finding suggests distinct operational modes for the brain  
365 between resting state and task-based networks. Consistent with this view, previous investigations  
366 comparing resting-state and task-based network activity in functional magnetic resonance imaging  
367 (fMRI) have revealed network reorganization between these states (Spadone, et al. 2015;  
368 Gonzalez-Casillo & Bandettini, 2018); in particular, the frequency profile of fMRI inter-  
369 connectivity shifts between resting and task-based activity, with lower frequencies dominating the  
370 former and more broadband representation during tasks (Ciuciu, et al. 2014). Although these



371 fluctuations operate on an order of magnitude below those measured by EEG in the present study  
372 (0.01-0.1Hz), they reveal a similar pattern to our findings, suggesting a correspondence (Bridwell,  
373 et al. 2013).

374 Notably, for the current study, the higher evoked frequencies did not depend on the  
375 stimulation site, suggesting a global change in brain functioning, independent of the local  
376 changes. Finally, our findings confirm that TMS can be a useful tool for evoking latent  
377 oscillations in the brain [14].

## 378 **Limitations**

379 In the current study, there is a possible limitation that should be noted. We recognize that  
380 the stimulation levels in our study are lower, on average, than used in previous reports. This was  
381 done to avoid auditory and somatosensory evoked artifacts in the EEG response. As a result, the  
382 evoked responses observed in EEG spectra are lower than previously reported. Yet, we note that  
383 TMS intensity was above 40 V/m, previously reported as minimal for evoking dominant  
384 frequencies (Rosanova, et al. 2009). Further, while the evoked responses are lower, they still  
385 adhere to the overall shape of the TMS-EP, exhibiting a clear N1-P2 complex. Additionally, if  
386 stimulation was having no effect, then no difference should be expected 1) between groups, or 2)  
387 for C4 stimulation on RT in the active-state, both of which were observed.

388 As an additional note, in observing our findings, one may discern that the frequency  
389 spectra for the global response exhibits only significant decreases in power, with a greater spread  
390 for the active group, whereas an overall higher natural frequency was observed for the active  
391 group. This apparent discrepancy can be explained by differences in the analyses; in the global  
392 frequency analysis (Figure 3), significance is assessed against baseline, in which only decreases  
393 were found to exceed the threshold. In contrast, the natural frequency analysis does not look for  
394 significant differences versus baseline, but only considers which frequency band showed the  
395 biggest consistent increase. As such, both analyses approach the present data with different  
396 outcomes in mind.

397 Finally, we note the marginal difference in stimulation rate between active and passive  
398 groups. In the passive group, stimulation was repeated at a randomized rate of 0.16 – 0.25Hz,  
399 whereas in the active group, because stimulation was tied directly to subject responses, a rate of  
400 0.4 – 0.45Hz occurred. While the active subjects received a higher rate of stimulation, it is  
401 unlikely to have contributed to the observed differences between active and passive groups.

402 First, so-called “slow” rTMS (<0.5 Hz) has only demonstrated inconsistent effects (Hoffman &  
403 Cavus, 2002), and with differences observed between lower or higher ranges. Second, while  
404 slower rates of rTMS can affect cortical responses, these are only administered in a steady,  
405 rhythmic fashion, and for a far higher number of pulses than used here per stimulation site.  
406 Third, in a post-hoc analysis, we found that faster RTs (and thus faster stimulation rates) did not  
407 correlate between subjects with differences in the observed natural frequency\*. Lastly, within  
408 subjects, we note that C4 stimulation, which led to a slower RT and thus slower stimulation rate,  
409 similarly did not engender lower natural frequencies.

## 410 **Conclusions**

411 We investigated TMS-evoked cortical reactivity differences between subjects who were  
412 either at rest (passive group) or engaged in a sensorimotor task (active group), while recording  
413 resultant EEG responses. The differences in evoked responses between the two experimental  
414 groups suggests that oscillatory mechanisms are characterized by complex, state-dependent  
415 patterns, with an overall higher mode of frequency during active engagement.

---

\* Pearson correlation:  $r = -0.051$ ,  $p > 0.05$

## 416 **Acknowledgements**

417 We would like to acknowledge Melody Barnard, our former undergraduate research  
418 assistant, for her help during data collection.

419  
420

## 421 **References**

422 Bridwell DA, Wu L, Eichele T, Calhoun VD. The spatospectral characterization of brain  
423 networks: Fusing concurrent EEG spectra and fMRI maps. *NeuroImage*. 2013;69:101-  
424 111.

425 Canolty RT, Edwards E, Dalal SS, Soltani M, Nagarajan SS, Kirsch HE, et al. High  
426 gamma power is phase-locked to theta oscillations in human neocortex. *Science*.  
427 2006;313:1626-1628.

428 Ciuciu P, Abry P, He BJ. Interplay between functional connectivity and scale-free  
429 dynamics in intrinsic fMRI networks. *NeuroImage*. 2014;95:248-263.

430 Conde V, Tomasevic L, Akopian I, Stanek K, Saturnino GB, Thielscher A, et al. The  
431 non-transcranial TMS-evoked potential is an inherent source of ambiguity in TMS-EEG  
432 studies. *NeuroImage*. 2019;185:300-312.

433 Crone NE, Miglioretti DL, Gordon B, Lesser RP. Functional mapping of human  
434 sensorimotor cortex with electrocorticographic spectral analysis II. Event-related  
435 synchronization in the gamma band. *Brain*. 1998;121:2301-2315.

436 Crone NE, Korzeniewska A, Franaszczuk PJ. Cortical gamma responses: Searching high  
437 and low. *Intl J Psychophysio*. 2011;79:9-15.

438 Delorme A, Makeig S. EEGLAB: An open source toolbox for analysis of single-trial  
439 EEG dynamics including independent component analysis. *J Neurosci Methods*.  
440 2004;134:9-21.

441 Fadiga L, Buccino G, Craighero L, Fogassi L, Gallese V, Pavesi G. Corticospinal  
442 excitability is specifically modulated by motor imagery: A magnetic stimulation study.  
443 *Neuropsychologia*. 1999;37:147-158.

444 Ferrarelli F, Sarasso S, Guller Y, Riedner BA, Peterson MJ, Bellesi M, et al. Reduced  
445 natural oscillatory frequency of frontal thalamocortical circuits in schizophrenia. *Arch*  
446 *Gen Psychiatry*. 2012;69:766-774.

447 Gonzalez-Castillo J, Bandettini PA. Task-based dynamic functional connectivity: Recent  
448 findings and open questions. *NeuroImage*. 2018;180:526-533.

449 Grandchamp R, Delorme A. Single-trial normalization for event-related spectral  
450 decomposition reduces sensitivity to noisy trials. *Front Neurosci*. 2011;2:1-14.

451 Groppe DM, Bickel S, Keller CJ, Jain SK, Hwang ST, Harden C, et al. Dominant  
452 frequencies of resting human brain activity as measured by the electrocorticogram.  
453 *NeuroImage*. 2013;79:223-233.

454 Hashimoto R, Rothwell JC. Dynamic changes in corticospinal excitability during motor  
455 imagery. *Exp Brain Res*. 1998;125:75-81.

456 Hillebrand A, Tewarie P, van Dellen E, Yu M, Carbo EWS, Douw L, et al. Direction of  
457 information flow in large-scale resting-state networks is frequency-dependent. *Proc Natl*  
458 *Acad Sci USA*. 2016;113:3867-3872.

459 Hoffman, R. E., & Cavus, I. Slow transcranial magnetic stimulation, long-term  
460 depotentiation, and brain hyperexcitability disorders. *American Journal of*  
461 *Psychiatry*, 2002; 159(7): 1093-1102.

462 Johnson JS, Kundu B, Casali G, Postle BR. Task-dependent changes in cortical  
463 excitability and effective connectivity: A combined TMS-EEG study. *J Neurophysiol*.  
464 2012;107:2383-2392.

465 Kasai T, Kawai S, Kawanishi M, Yahagi S. Evidence for facilitation of motor evoked  
466 potentials (MEPs) induced by motor imagery. *Brain Res*. 1997;744:147-150.

467 Kothe C. Clean\_rawdata() (Version 0.34) [EEGLAB extension]. 2014. Available from:  
468 [https://sccn.ucsd.edu/wiki/EEGLAB\\_Extensions](https://sccn.ucsd.edu/wiki/EEGLAB_Extensions)

469 Lioumis P, Kičić D, Savolainen P, Mäkelä JP, Kähkönen S. Reproducibility of TMS–  
470 evoked EEG responses. *Hum Brain Map*. 2009;30:1387-1396.

471 Maris E, Oostenveld R. Nonparametric statistical testing of EEG- and MEG-data. *J*  
472 *Neurosci Methods*. 2007;164:177-190.

473 Massimini M, Ferrarelli F, Murphy MJ, Huber R, Riedner BA, Casarotto S, et al. Cortical  
474 reactivity and effective connectivity during REM sleep in humans. *Cog Neurosci*.  
475 2010;1:176-183.

476 Massimini M, Ferrarelli F, Murphy MJ, Huber R, Esser SK, Singh H, et al. Breakdown of  
477 cortical effective connectivity during sleep. *Science*. 2005;309:2228-2232.

478 Matthews PBC. The effect of firing on the excitability of a model motoneurone and its  
479 implications for cortical stimulation. *J Physiol*. 1999;518:867-882.

480 Mellem MS, Wohltjen S, Gotts SJ, Ghuman AS, Martin A. Intrinsic frequency biases and  
481 profiles across human cortex. *J Neurophysiol*. 2017;118:2853-2864.

482 Miniussi C, Thut G. Combining TMS and EEG offers new prospects in cognitive  
483 neuroscience. *Brain Topogr*. 2010;22:249-256.

484 Mullen T, Kothe C, Chi YM, Ojeda A, Kerth T, Makeig S, et al. Real-time modeling and  
485 3D visualization of source dynamics and connectivity using wearable EEG. *Conf Proc*  
486 *IEEE Eng Med Biol Soc*. 2013;2013:2184-2187.

487 Murray MM, Brunet D, Michel CM. Topographic ERP analysis: A step-by-step tutorial  
488 review. *Brain Topogr*. 2008;20:249-264.

489 Niedermeyer E. The normal EEG of the waking adult. In: Niedermeyer E, Lopes da Silva  
490 F, editors. *Electroencephalography: Basic principles, clinical applications and related*  
491 *fields*. 4th ed. Baltimore, MD: Williams & Wilkins; 1999.

492 Peirce, JW. Generating stimuli for neuroscience using PsychoPy. *Front Neuroinfo*.  
493 2009;2:1-8.

494 Petrichella S, Johnson N, He B. The influence of corticospinal activity on TMS-evoked  
495 activity and connectivity in healthy subjects: A TMS-EEG study. *PLoS ONE*; 2017;12:1-  
496 18.

497 Rogasch NC, Sullivan C, Thomson RH, Rose NS, Bailey NW, Fitzgerald PB, et al.  
498 Analysing concurrent transcranial magnetic stimulation and electroencephalographic data:  
499 A review and introduction to the open-source TESA software. *Neuroimage*.  
500 2017;147:934-951.

501 Romei V, Thut G, Silvanto J. Information-based approaches of noninvasive transcranial  
502 brain stimulation. *Trends in Neurosci*. 2016;39:782-795.

503 Romei V, Rihs T, Brodbeck V, Thut G. Resting electroencephalogram alpha-power over  
504 posterior sites indexes baseline visual cortex excitability. *NeuroReport*. 2008;19:203-208.  
505 Silvanto J, Pascual-Leone A. State-dependency of transcranial magnetic stimulation.  
506 *Brain Topogr*. 2008;21:1-10.  
507 Spadone S, Della Penna S, Sestieri C, Betti V, Tosoni A, Perrucci MG, et al. Dynamic  
508 reorganization of human resting-state networks during visuospatial attention. *Proc Natl*  
509 *Acad Sci USA*. 2015;112:8112-8117.  
510 Sparing R, Mottaghy FM, Ganis G, Thompson WL, Töpper R, Kosslyn SM, et al. Visual  
511 cortex excitability increases during visual mental imagery—A TMS study in healthy  
512 human subjects. *Brain Res*. 2002;938:92-97.  
513 Rossi S, Hallett M, Rossini PM, Pascual-Leone A, The Safety of TMS Consensus Group.  
514 Safety, ethical considerations, and application guidelines for the use of transcranial  
515 magnetic stimulation in clinical practice and research. *Clin Neuropsych*. 2009;120:2008-  
516 2039.  
517 Romero MC, Davare M, Armendariz M, Janssen P. Neural effects of transcranial  
518 magnetic stimulation at the single-cell level. *Nat Comm*. 2019;10(1), 2642.  
519 Rosanova M, Casali A, Bellina V, Resta F, Mariotti M, Massimini M. Natural  
520 frequencies of human corticothalamic circuits. *J Neurosci*. 2009;29:7679-7685.  
521 Siebner HR, Hartwigsen G, Kassuba T, Rothwell JC. How does transcranial magnetic  
522 stimulation modify neuronal activity in the brain? Implications for studies of cognition.  
523 *Cortex*. 2009;45:1035-1042.  
524 Silvanto J, Muggleton NG, Cowey A, Walsh V. Neural adaptation reveals state-  
525 dependent effects of transcranial magnetic stimulation. *Euro J Neurosci*. 2007;25:1874-  
526 1881.  
527 ter Braack EM, de Vos CC, van Putten MJAM. Masking the auditory evoked potential in  
528 TMS-EEG: A comparison of various methods. *Brain Topogr*. 2015;28:520-528.  
529 Thielscher A, Antunes A, Saturnino GB. Field modeling for transcranial magnetic  
530 stimulation: A useful tool to understand the physiological effects of TMS? *IEEE EMBC*  
531 2015: Proceedings of the 37th Annual International Conference of the IEEE Engineering  
532 in Medicine and Biology Society; 2015 Aug 25-29; Milano, Italy. p. 222-225.

533 Thut G, Veniero D, Romei V, Miniussi C, Schyns P, Gross J. Rhythmic TMS causes  
534 local entrainment of natural oscillatory signatures. *Curr Biol.* 2011;1:1176-1185.  
535 Thut G, Northoff G, Ives JR, Kamitani Y, Pfennig A, Kampmann F, et al. Effects of  
536 single-pulse transcranial magnetic stimulation (TMS) on functional brain activity: A  
537 combined event-related TMS and evoked potential study. *Clin Neurophysiol.*  
538 2003;114:2071-2080.  
539 Voytek B, Canolty RT, Shestyk A, Crone NE, Parvizi J, Knight RT. Shifts in gamma  
540 phase-amplitude coupling frequency from theta to alpha over posterior cortex during  
541 visual tasks. *Front Human Neurosci.* 2010;4:1-9.
